# Supplementary material
Source: publisher figshare collection journal article supplement (https://tandf.figshare.com/ndownloader/files/13550000)
Supplement: Supplementary file 1 [file 13550000]

**Supplementary Material**

**Workshop participants’ responses to questionnaire**

| **Likert Statement on questionnaire** | **% of participants who agreed with statement (n)** |
| --- | --- |
| The workshop was a good was for me to share information with my colleagues | 83% (45) |
| The workshop was a good way for me to learn about dementia | 93% (50) |
| The objectives of the workshop were clear to me | 93% (50) |
| The content was relevant to my daily practice | 90% (49) |
| The workshop has contributed to improved and enhanced team working and collaboration | 85% (46) |
| The workshop has improved my confidence in understanding the roles and expertise of all members of the PCT | 88%(48) |
| The workshop has improved my understanding of what people with dementia and their carers need and how I can support them | 93% (50) |
| The workshop has improved my knowledge of dementia risk factors and how memory works | 87% (47) |
| The workshop has improve my knowledge of dementia assessment and management | 94% (51) |
